# Supplementary material for: Primary emissions of glyoxal and methylglyoxal from laboratory measurements of open biomass burning
Source: Copernicus journal article supplement (doi:10.5194/acp-18-15451-2018), 2018-10-26
Supplement: Supplementary file 1 [file acp-18-15451-2018-supplement.zip]

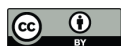

*Supplement of*

## **Primary emissions of glyoxal and methylglyoxal from laboratory measurements of open biomass burning**

**Kyle J. Zarzana et al.**

*Correspondence to:* Steven S. Brown ([steven.s.brown@noaa.gov](mailto:steven.s.brown@noaa.gov))

- [acp-18-15451-2018-supplement-title-page.pdf](#)
- [Zarzana\\_et al\\_Biomass\\_Burning\\_Glyoxal\\_sup](#)
  - [\\_Zarzana\\_et al\\_Biomass\\_Burning\\_Glyoxal\\_sup.xlsx](#)
  - [Zarzana\\_et al\\_Biomass\\_Burning\\_Glyoxal\\_Sup.pdf](#)
  - [Zarzana\\_et al\\_Biomass\\_Burning\\_Glyoxal\\_sup.xlsx](#)

The copyright of individual parts of the supplement might differ from the CC BY 4.0 License.
