# Supplementary material for: Primary emissions of glyoxal and methylglyoxal from laboratory measurements of open biomass burning
Source: Copernicus journal article supplement (doi:10.5194/acp-18-15451-2018), 2018-10-26
Supplement: Supplementary file 2 [file acp-18-15451-2018-supplement.zip]

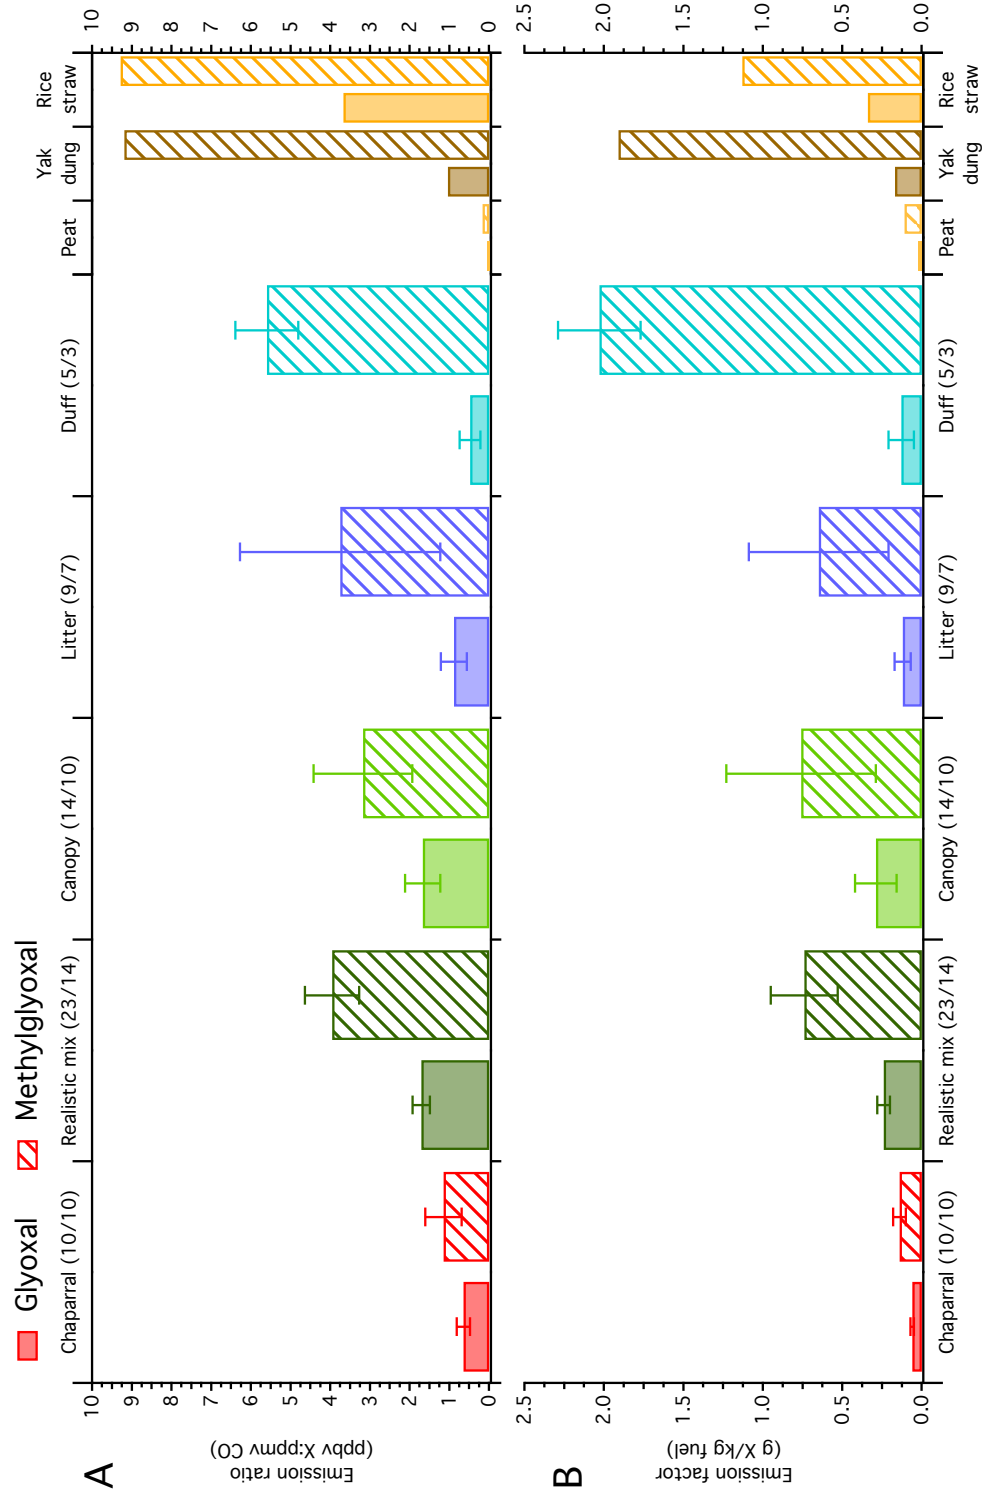

**Figure S1.** Emission ratios (A) and factors (B) for glyoxal (solid bars) and methylglyoxal (striped bars) from the five main fuel groups (chaparral, realistic coniferous mixes, conifer canopy, conifer litter, and conifer duff) and select other fuels. The numbers in parentheses after the fuel type are the number of burns for that fuel type for glyoxal and methylglyoxal respectively. Only one burn each was conducted for peat, yak dung, rice straw, and bear grass.

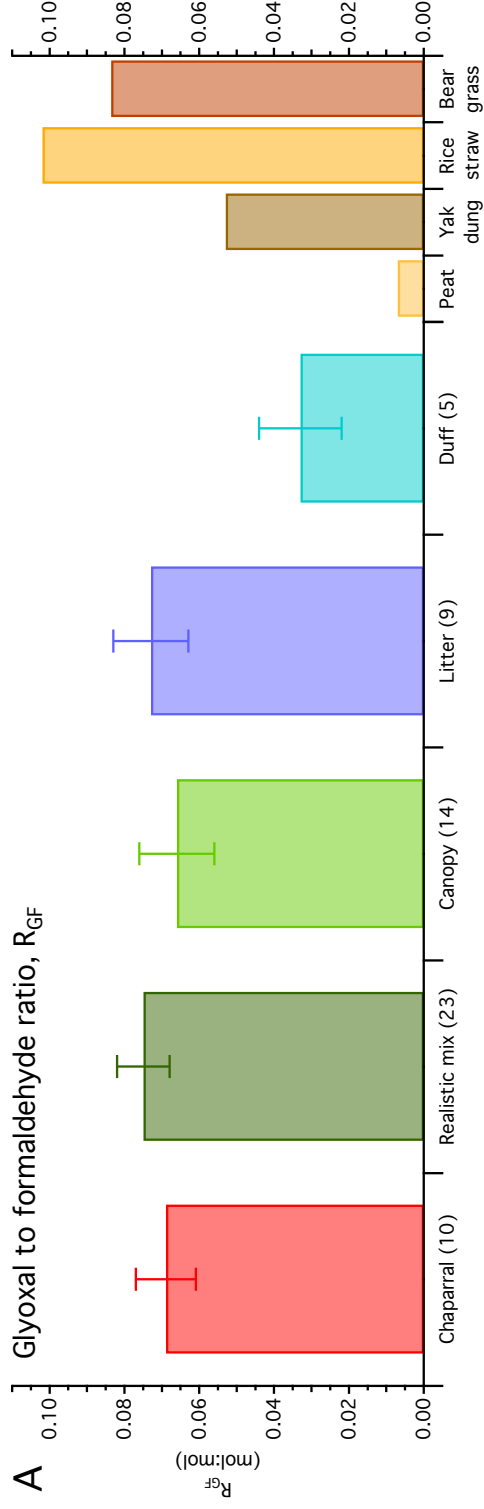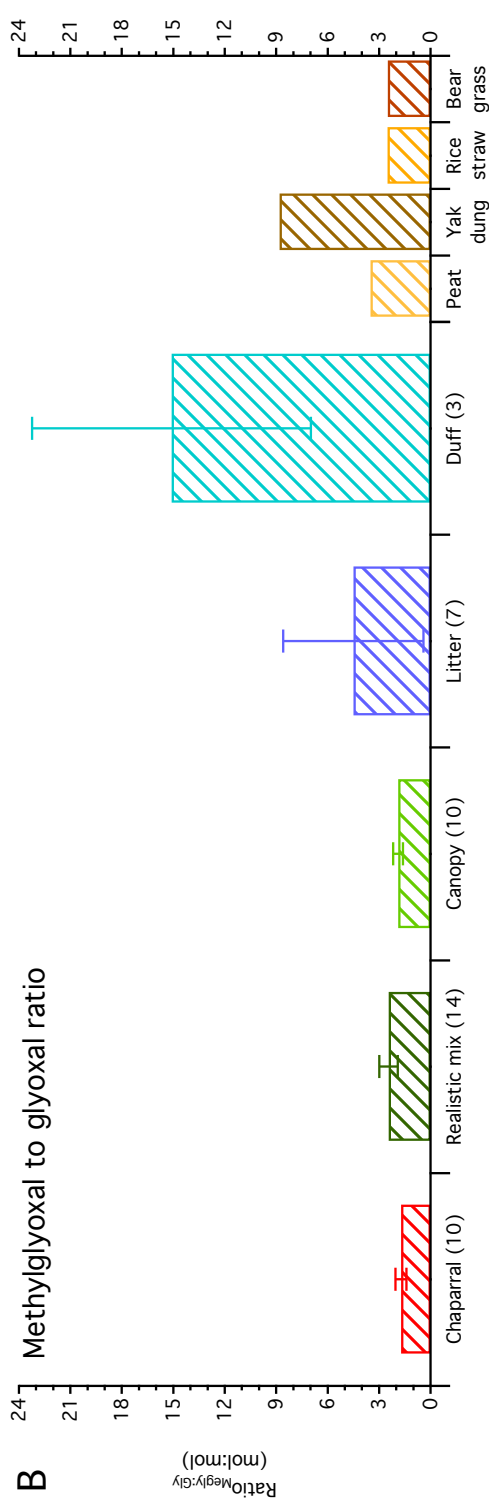

**Figure S2.**  $R_{GF}$  using formaldehyde data from the OP-FTIR (A) and methylglyoxal to glyoxal ratios (B) for the same fuels as in Fig. S1.
